# Supplementary material for: Improved electronic uniformity and nanoscale homogeneity in template-grown CsPbBr3 nanorods
Source: Royal Society of Chemistry journal article supplement (doi:10.1039/d3nr06682g), 2024-01-01
Supplement: d3nr06682g1.pdf [file d3nr06682g1.pdf]

## Supplementary Information

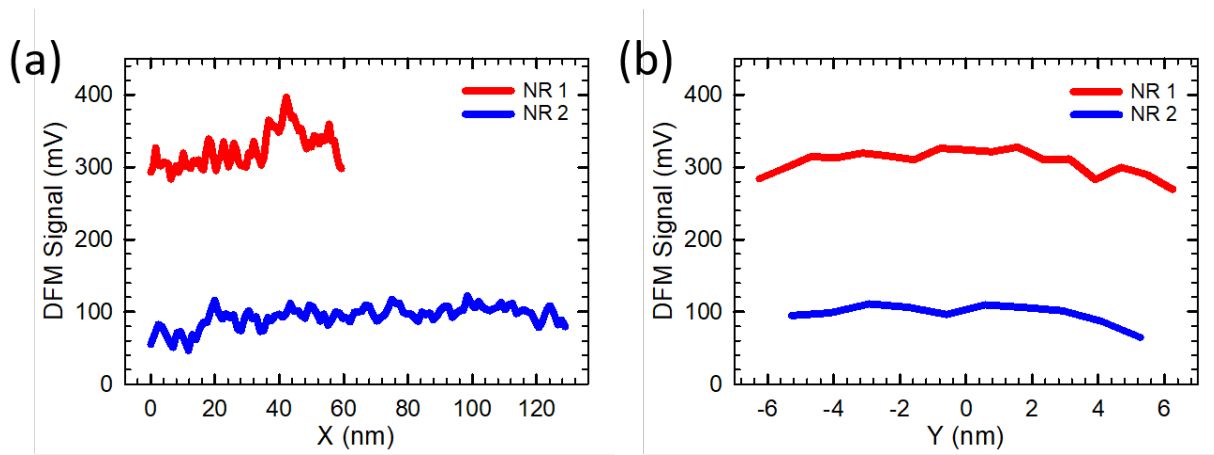

Fig. S1 (a) DFM signal as a function of X extracted from the dielectric response images for NR 1 and NR 2 at  $V_{DC} = 3$  V. (b) DFM signal as a function of Y extracted from the dielectric response images for NR 1 and NR 2 at  $V_{DC} = 3$  V.

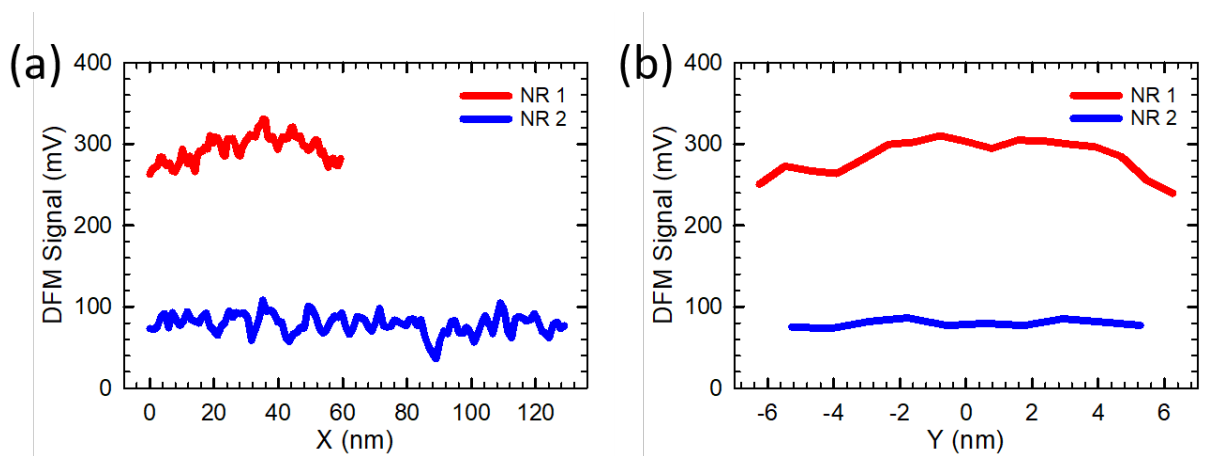

Fig. S2 (a) DFM signal as a function of X extracted from the dielectric response images for NR 1 and NR 2 at  $V_{DC} = 0$  V. (b) DFM signal as a function of Y extracted from the dielectric response images for NR 1 and NR 2 at  $V_{DC} = 0$  V.
